# Supplementary material for: Effective Blue Light-Absorbing AuAg Nanoparticles in InP Quantum Dots-Based Color Conversion
Source: MDPI journal article supplement (doi:10.3390/ma15238455), 2022-11-27
Supplement: s1 [file s1]

## Supplementary Materials

# Effective Blue Light-Absorbing AuAg Nanoparticles in InP Quantum Dots-Based Color Conversion

Hyo-Jin Yeo <sup>1,†</sup>, Suk-Young Yoon <sup>1,†</sup>, Dae-Yeon Jo <sup>1</sup>, Hyun-Min Kim <sup>1</sup>, Jeonghun Kwak <sup>2,\*</sup>,  
Sung-Phil Kim <sup>3</sup>, Myung-Joon Kim <sup>4</sup> and Heesun Yang <sup>1,\*</sup>

<sup>1</sup> Department of Materials Science and Engineering, Hongik University, Seoul 04066, Republic of Korea

<sup>2</sup> Department of Electrical and Computer Engineering, Seoul National University, Seoul 08826, Republic of Korea

<sup>3</sup> Department of Biomedical Engineering, Ulsan National Institute of Science and Technology, Ulsan 44919, Republic of Korea

<sup>4</sup> Department of Big Data Application, Hannam University, Daejeon 34430, Republic of Korea

\* Correspondence: jkwak@snu.ac.kr (J.K.); hyang@hongik.ac.kr (H.Y.)

† These authors contributed equally to this work.

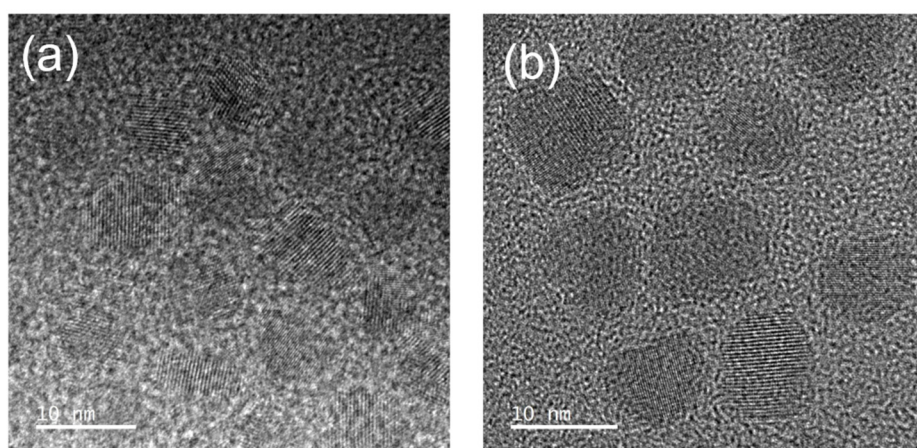

**Figure S1.** Higher-magnification TEM images of (a) green and (b) red InP/ZnSe/ZnS QDs (scale bars are 10 nm for both).

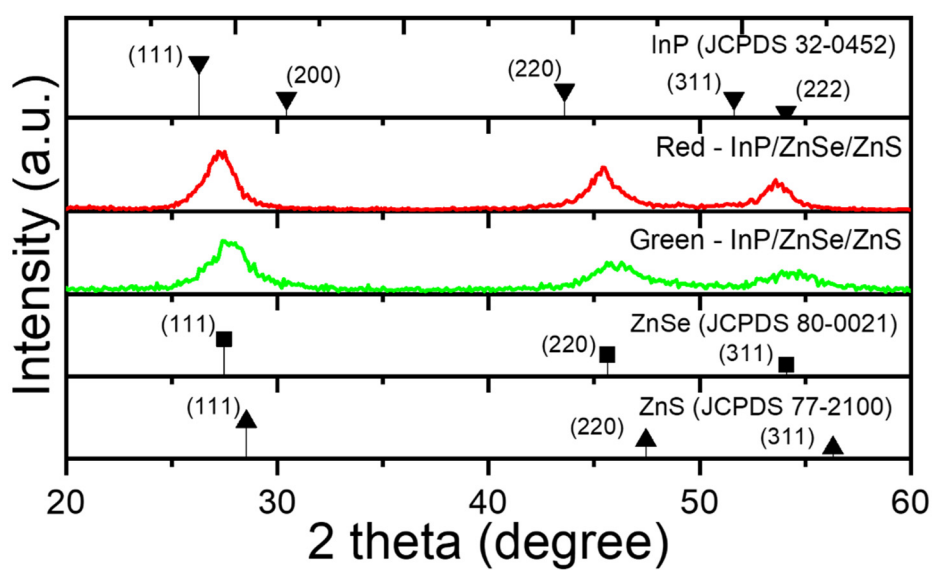

**Figure S2.** Powder XRD patterns of green and red InP/ZnSe/ZnS QDs.

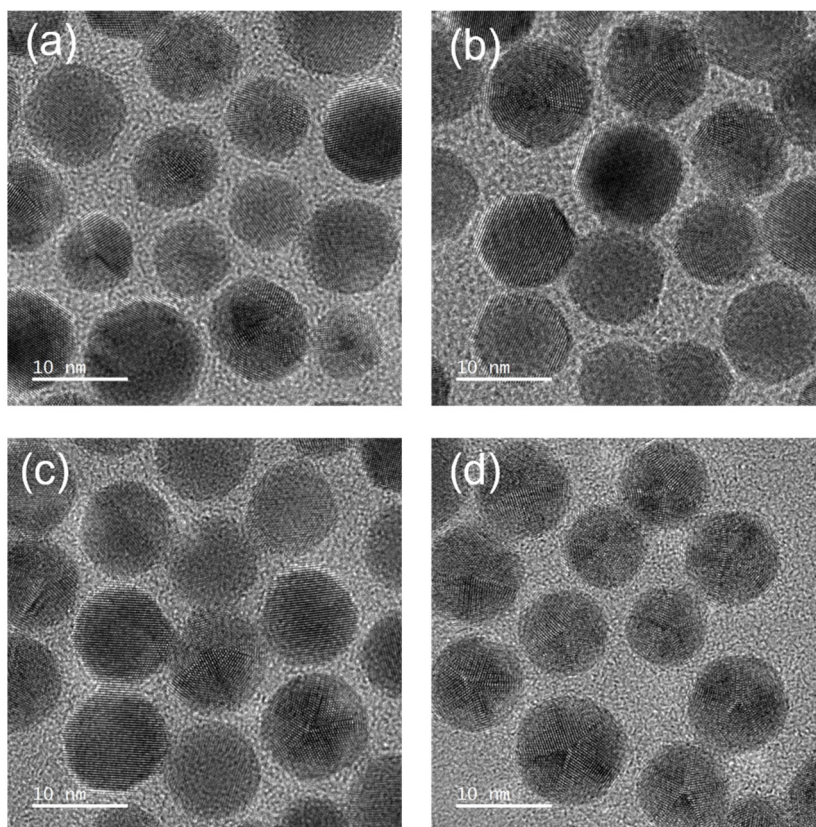

**Figure S3.** Higher-magnification TEM images of AuAg alloy NPs synthesized with Au/Ag precursor ratios of (a) 0.45, (b) 1, (c) 2.3, and (d) 3 (scale bars are 10 nm for all).

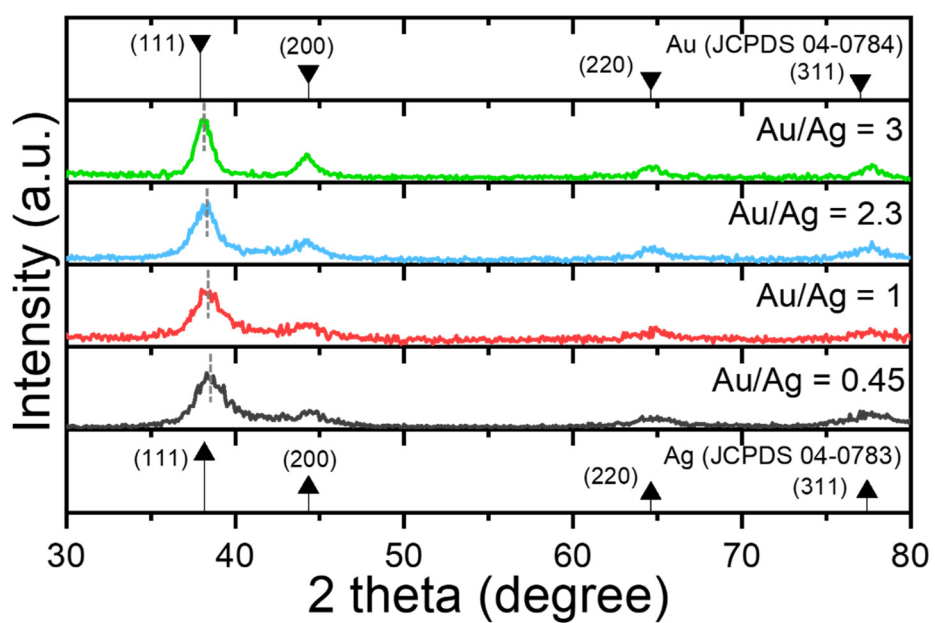

**Figure S4.** XRD patterns of a series of AuAg NPs with different Au/Ag ratios.

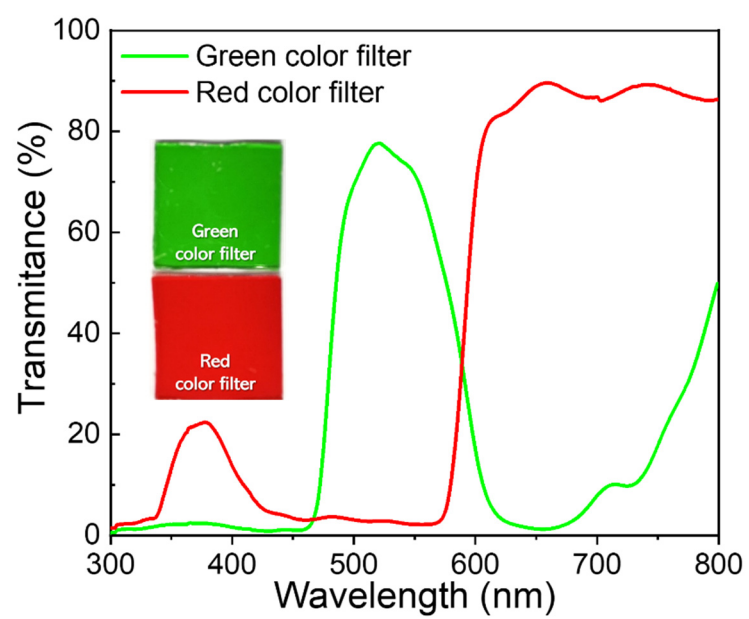

**Figure S5.** Typical transmittance spectra of commercial LCD green and red color filters.
